# Supplementary material
Source: PubMed Central journal article supplement (PMC8930476)
Supplement: NIHMS1764299-supplement-1.pdf [file NIHMS1764299-supplement-1.pdf]

## Supporting Information

### **Title: Inorganic-Organic Interpenetrating Network Hydrogels as Tissue-Integrating Luminescent Implants: Physicochemical Characterization and Preclinical Evaluation**

*Rachel M. Unruh, Lindsey R. Bornhoeft, Scott P. Nichols, Natalie A. Wisniewski, and Michael J. McShane\**

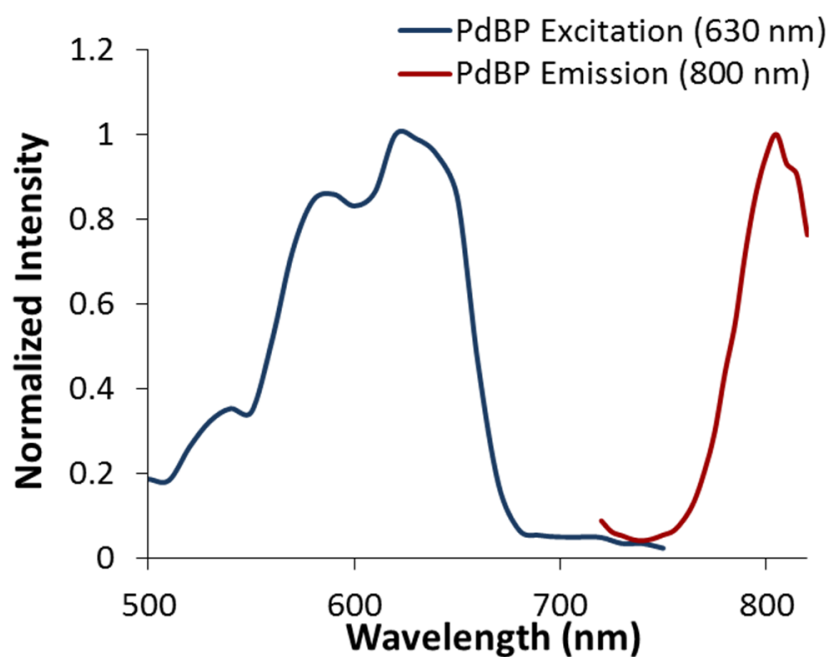

**Figure S1.** PdBP excitation and emission spectra

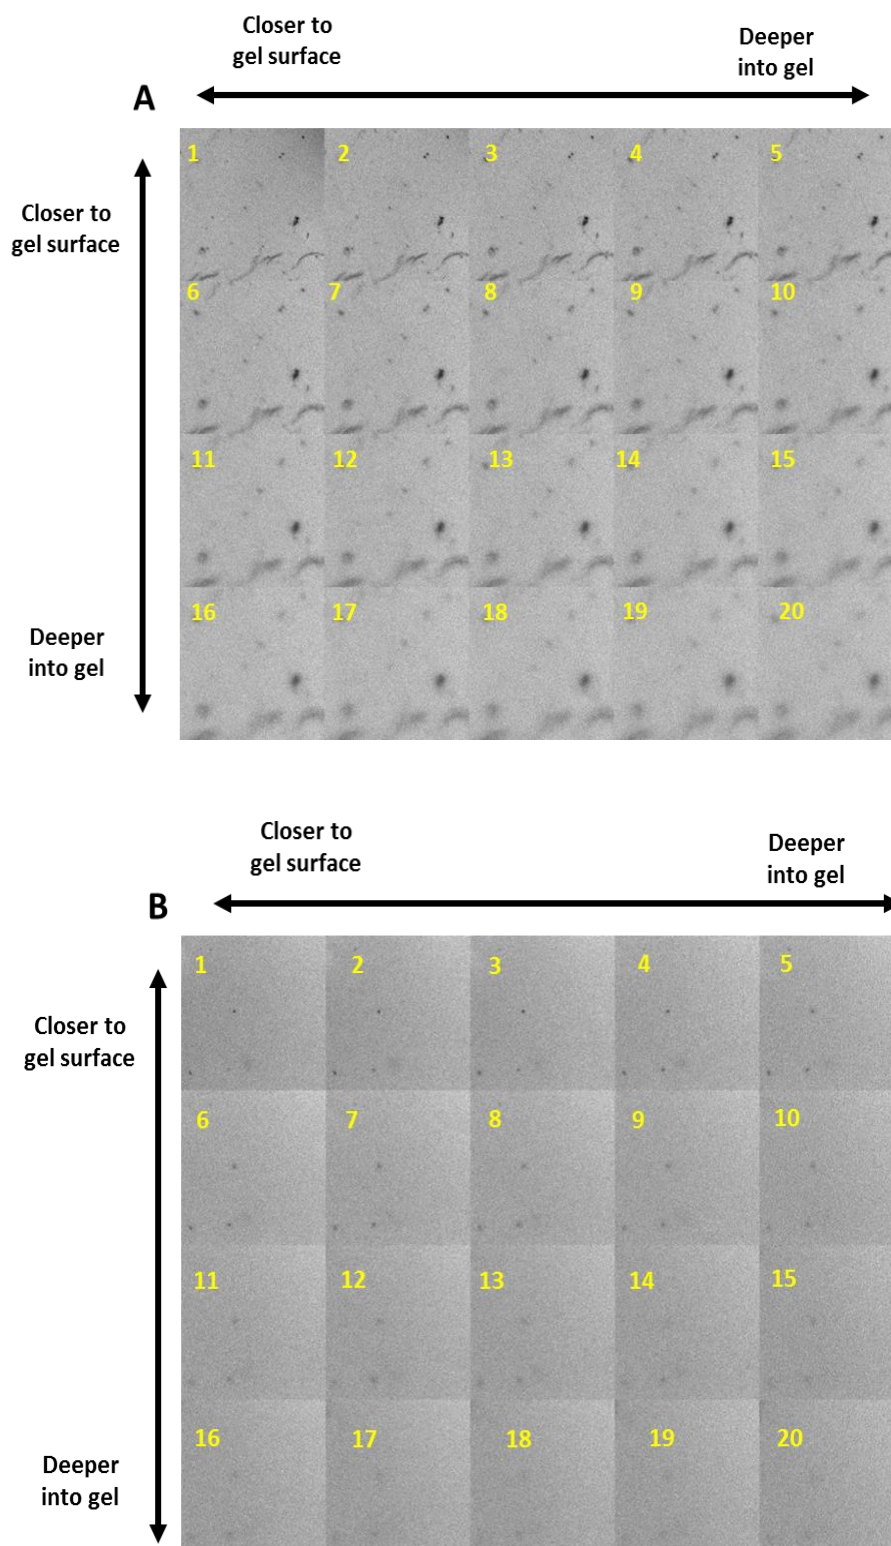

**Figure S2.** Begins here (full caption on next page). Figure spans two pages.

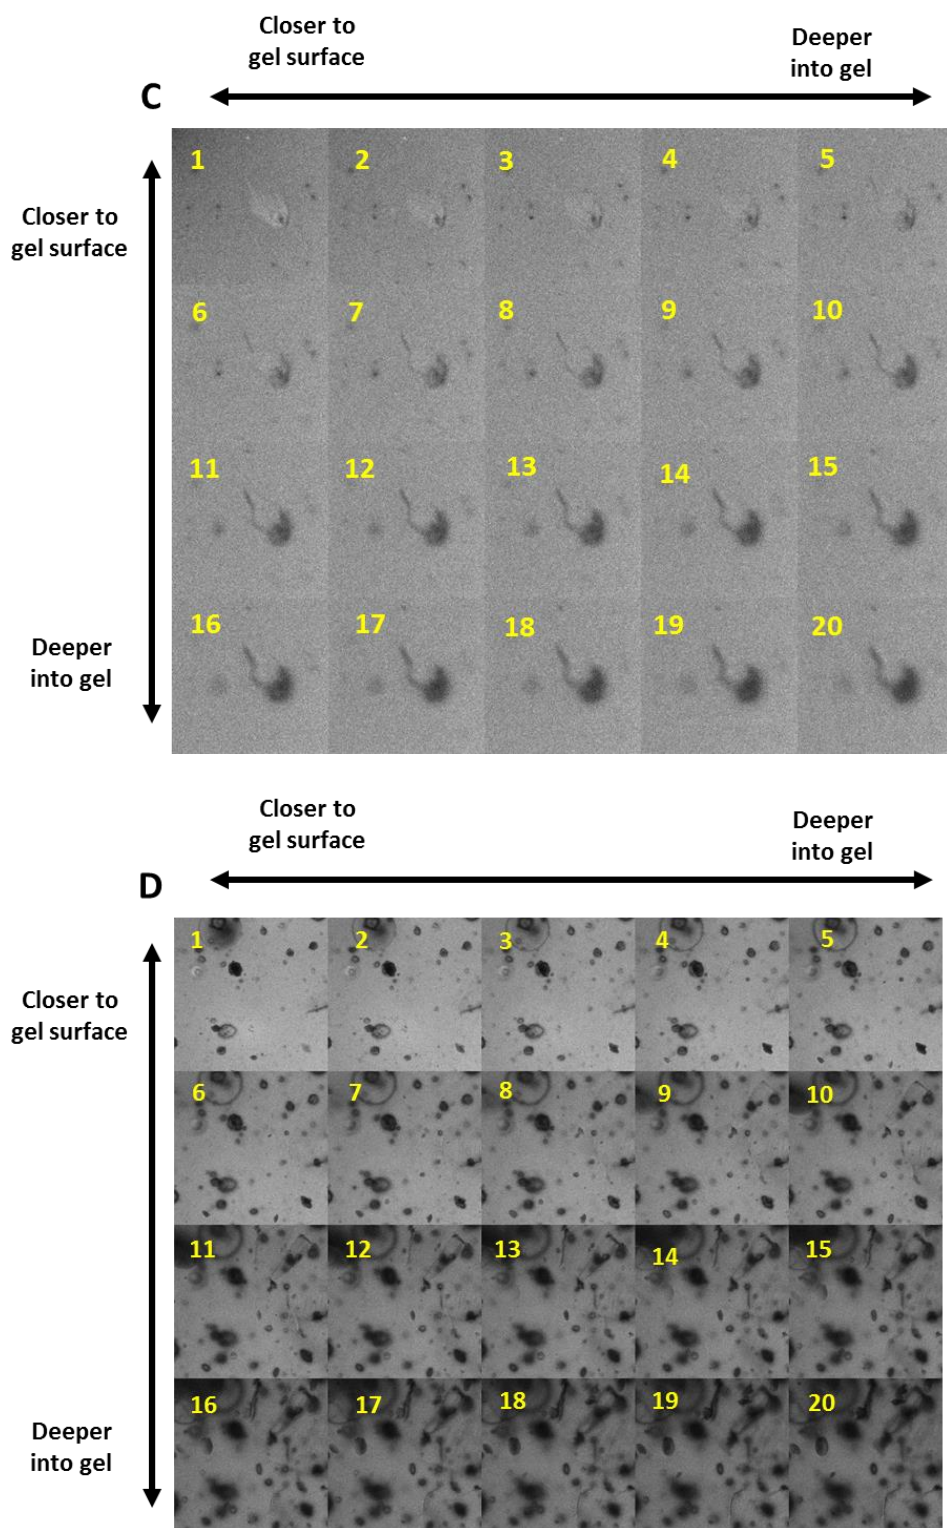

**Figure S2.** Montages of confocal Z-stack slices. Each image within the montage represents a single slice. Increasing slice number corresponds to a deeper location in the gel. Formulations corresponding to each image are as follows: A = 50:50 TRIS:DMA, B = 60:40 TRIS:DMA, C = 70:30 TRIS:DMA, and D = 80:20 TRIS:DMA.

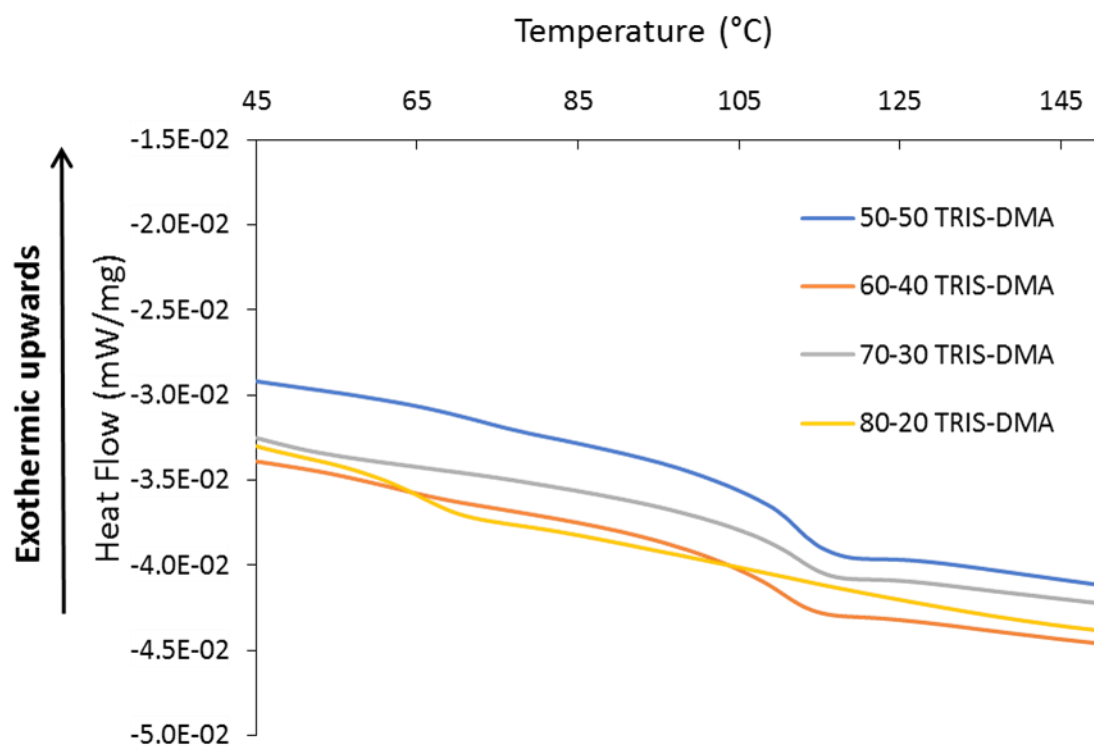

**Figure S3.** Raw DSC Data; representative curves

**Table S1.** Sensitivity and percent change for IPN ICC implants from baseline to peak during *in vivo* oxygen challenge (n=3  $\pm$  95% CI).

| Implantation time (days) | Sensitivity ( $\mu$ s) | Percent Change in Signal Level |
|--------------------------|------------------------|--------------------------------|
| 0                        | 50.09 $\pm$ 94.55      | 164.24 $\pm$ 287.92            |
| 6                        | 69.42 $\pm$ 30.66      | 55.23 $\pm$ 57.37              |
| 20                       | 29.45 $\pm$ 1.90       | 8.72 $\pm$ 3.20                |
| 34                       | 19.61 $\pm$ 4.18       | 8.72 $\pm$ 2.17                |
| 48                       | 35.49 $\pm$ 11.42      | 16.02 $\pm$ 6.36               |
| 76                       | 45.05 $\pm$ 13.83      | 21.47 $\pm$ 7.94               |

**Table S2.** Sensitivity and percent change for pHEMA ICC implants from baseline to peak during *in vivo* oxygen challenge (n=3  $\pm$  95% CI).

| Implantation time (days) | Sensitivity ( $\mu$ s) | Percent Change in Signal Level |
|--------------------------|------------------------|--------------------------------|
| 0                        | 49.98 $\pm$ 9.45       | 74.07 $\pm$ 20.91              |
| 8                        | 26.75 $\pm$ 10.14      | 19.70 $\pm$ 7.28               |
| 14                       | 40.08 $\pm$ 18.72      | 28.42 $\pm$ 16.83              |
| 28                       | 24.13 $\pm$ 5.31       | 12.74 $\pm$ 3.51               |
| 42                       | 21.12 $\pm$ 5.31       | 11.07 $\pm$ 3.12               |
| 56                       | 39.03 $\pm$ 8.73       | 22.08 $\pm$ 7.31               |
| 84                       | 54.30 $\pm$ 9.71       | 30.91 $\pm$ 5.64               |

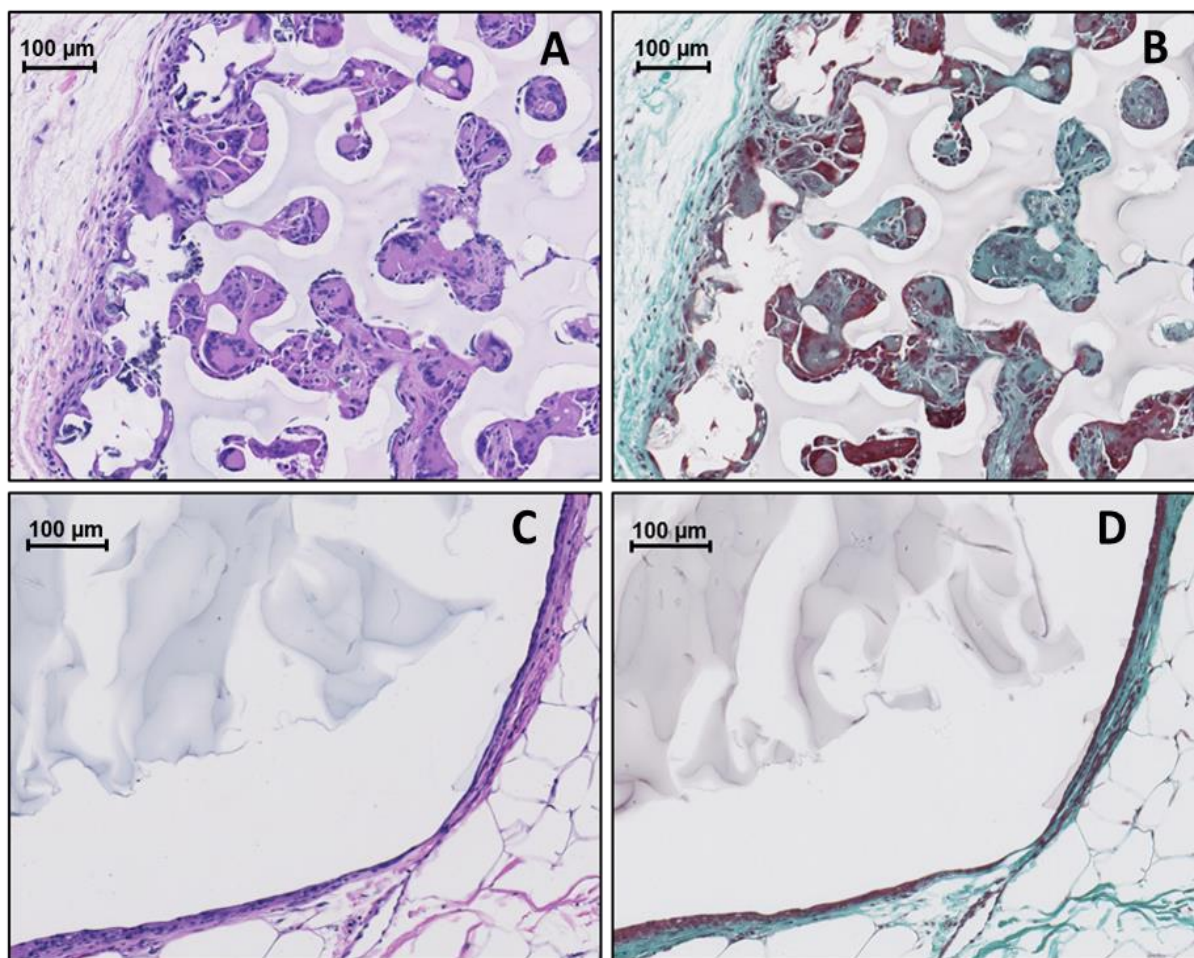

**Figure S4.** Histology images (H&E stain: A and C; Masson's Trichrome stain: B and D) showing side-by-side comparison of the loosely-woven collagen around the IPN ICCs (A-B) and tightly-packed collagen surrounding IPN monolith implants (C-D).
